# Supplementary material for: Medical expenses of urban Chinese patients with stomach cancer during 2002–2011: a hospital-based multicenter retrospective study
Source: Springer Nature journal article supplement (doi:10.1186/s12885-018-4357-y), 2018-04-17

### A. By province

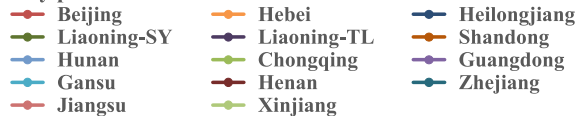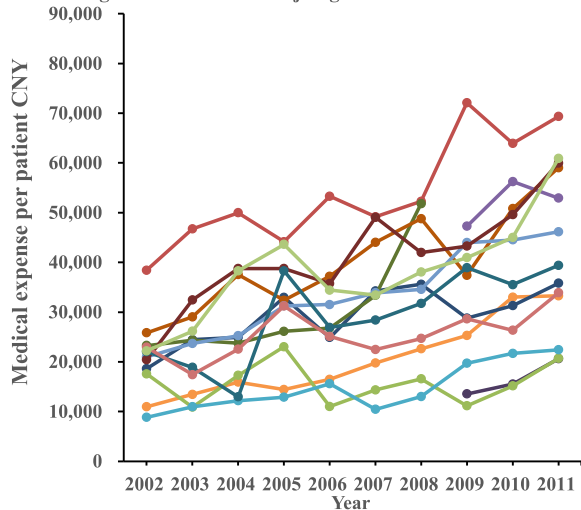

### B. By data reliability

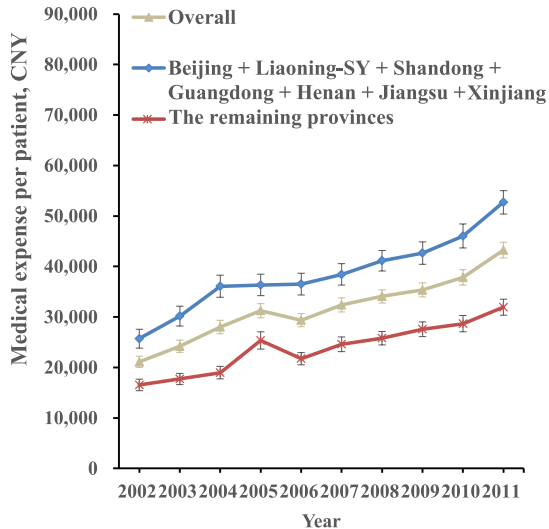

Supplement: MOESM1 [file 15703316]
